# Supplementary material for: Development and validation of a self-administered questionnaire to estimate the distance and mode of children’s travel to school in urban India
Source: PubMed Central journal article supplement (PMC4625478; doi:10.1186/s12874-015-0086-y), 2015-10-28
Supplement: 12874_2015_86_MOESM3_ESM.pdf [file 12874_2015_86_MOESM3_ESM.pdf]

## ***Survey on the Public Health Impacts of Children's Travel to School***

*Please answer the following questions as best as you can- there are no right or wrong answers. The answers you give will be kept private. Thank you for your help.*

**1.Name:**

**2. Age:**  years

**3. Gender:** 1.Boy  2. Girl

**4. Home address & landmark:**

|      |
|------|
| <br> |
| <br> |
| <br> |
| <br> |

### **Travel to School**

**5. How did you travel to school today?**

| No. | Mode of travel | From | To | Time taken (minutes) |
|-----|----------------|------|----|----------------------|
| 1   | Walk           |      |    |                      |
| 2   | Cycle          |      |    |                      |
| 3   | School bus     |      |    |                      |
| 4   | Car            |      |    |                      |
| 5   | 2 wheeler      |      |    |                      |
| 6   | RTC bus        |      |    |                      |
| 7   | Auto-rickshaw  |      |    |                      |
| 8   | Cycle-rickshaw |      |    |                      |
| 9   | Train          |      |    |                      |
| 10  | Other          |      |    |                      |

**6. With whom did you come to school today?**

1. Parent     2. Grand-parent     3. Other children     4. Other adult     5. Alone

**7. How do you travel to school during a usual week?**

1. Walk     2. Cycle     3. School bus     4. Car     5.   
2 wheeler
6. RTC bus     7. Auto     8. Rickshaw     9. Train     10. Other

**Travel to Home**

**8. How will you go from school to home today?**

1. Walk     2. Cycle     3. School bus     4. Car     5.   
2 wheeler
6. RTC bus     7. Auto     8. Rickshaw     9. Train     10. Other

**9. With whom will you go from school to home today?**

1. Parent     2. Grand-parent     3. Other children     4. Other adult     5. Alone

**10. How do you travel home during a usual week?**

1. Walk     2. Cycle     3. School bus     4. Car     5.   
2 wheeler
6. RTC bus     7. Auto     8. Rickshaw     9. Train     10. Other

**11. How would you LIKE to or WISH to travel to and from school?**

1. Walk     2. Cycle     3. School bus     4. Car     5.   
2 wheeler
6. RTC bus     7. Auto     8. Rickshaw     9. Train     10. Other

**12. How do you travel to school during the RAINS?**

1. Walk     2. Cycle     3. School bus     4. Car     5.   
2 wheeler
6. RTC bus     7. Auto     8. Rickshaw     9. Train     10. Other

**13. How do you travel to school during HOT WEATHER?**

1. Walk     2. Cycle     3. School bus     4. Car     5.   
2 wheeler
6. RTC bus     7. Auto     8. Rickshaw     9. Train     10. Other

**14. Are you allowed by your parents to cross main roads alone? (Main roads are important, busy roads with lots of traffic)**

1. Always     2. Sometimes     3. Rarely     4. Never

**15. Are you allowed by your parents to cycle on main roads alone?**

1. Always     2. Sometimes     3. Rarely     4. Never     5. I don't know cycling

**16. How safe do you feel when you travel to and from school? (Safe means not worried, not feeling uneasy about anything in particular)**

1. Very safe     2. Fairly safe     3. Not very safe     4. Not at all safe

**17. What are you worried about, during your journey to school?**

1. Traffic     2. Strangers     3. Being late   
4. Getting lost     5. Being teased     6. Nothing

**18. During the past week, after school, on how many days did you exercise?**

*(Example: running, fast walking, playing games, cycling, dancing, sports).*

Do not include your PT or games period.

- None     1 day     2 days     3 days     4 days   
5 days     6 days     7 days

**19. During the past week, after school, how many hours did you exercise?**

Do not include your PT or games period.

- None     half an hour a week     1 hour a week   
2-3 hours a week     4-6 hours a week     7 hours a week

**20. During the past week, how many PT or games periods did you attend?**

None  1 period  2 periods  3 periods  4 periods   
5 periods  6 periods  7 periods

**21. During the past 12 months, were you injured in a road accident?** *(An injury is when it makes you miss at least one full day of usual activities **OR** requires treatment by a doctor or nurse).*

1. Yes  2. No
